# Supplementary material
Source: PubMed Central journal article supplement (PMC6851456)
Supplement: NIHMS1528970-supplement-1.pdf [file NIHMS1528970-supplement-1.pdf]

Supplemental Table.

*Unstandardized Results for the Unconditional Latent Growth Model of T2 - T4 Internalizing and Externalizing Behavior*

|                             | Internalizing             |           |          | Externalizing             |           |          |
|-----------------------------|---------------------------|-----------|----------|---------------------------|-----------|----------|
|                             | <i>B</i>                  | <i>SE</i> | <i>p</i> | <i>B</i>                  | <i>SE</i> | <i>p</i> |
| <i>Means</i>                |                           |           |          |                           |           |          |
| Intercept                   | 0.49                      | (0.02)    | < .001   | 0.64                      | (0.04)    | < .001   |
| Slope                       | -0.02                     | (0.01)    | .10      | 0.01                      | (0.02)    | .50      |
| <i>Variances</i>            |                           |           |          |                           |           |          |
| Intercept                   | 0.04                      | (0.01)    | < .001   | 0.12                      | (0.02)    | <.001    |
| Slope                       | 0.01                      | (0.00)    | .04      | 0.02                      | (0.01)    | .02      |
| <i>Covariance</i>           |                           |           |          |                           |           |          |
| Intercept with slope        | 0.01                      | (0.00)    | .08      | 0.03                      | (0.01)    | .004     |
| <i>Model Fit Statistics</i> |                           |           |          |                           |           |          |
| $\chi^2$ (df)               | 3.48 (1), <i>p</i> = .062 |           |          | 0.34 (1), <i>p</i> = .562 |           |          |
| RMSEA                       | 0.15                      |           |          | 0.00                      |           |          |
| CFI/TLI                     | 0.98/0.94                 |           |          | 1.00/1.02                 |           |          |
| SRMR                        | 0.03                      |           |          | 0.01                      |           |          |

*Note.* *n* = 114. T2 = 3 months post-baseline, T4 = 6 months post-baseline. RMSEA = Root Mean

Square Error; CFI = Comparative Fit Index; TLI = Tucker-Lewis Index; SRMR = Standardized

Root Mean Square Residual.
